# Supplementary material
Source: ML conference proceedings conference paper supplement (https://proceedings.mlr.press/v139/vincent-cuaz21a.html)
Supplement: Supplementary file [file vincent-cuaz21a-supp.pdf]

# Supplementary material for Online Graph Dictionary Learning

## 1. Notations & definitions

In this section we recall the notations used in the rest of the supplementary.

For matrices we note  $S_N(\mathbb{R})$  the set of symmetric matrices in  $\mathbb{R}^{N \times N}$  and  $\langle \cdot, \cdot \rangle_F$  the Frobenius inner product defined for real matrices  $C_1, C_2$  as  $\langle C_1, C_2 \rangle_F = \text{tr}(C_1^\top C_2)$  where  $\text{tr}$  denotes the trace of matrices. Moreover  $C_1 \odot C_2$  denotes the Hadamard product of  $C_1, C_2$ , i.e.  $(C_1 \odot C_2)_{ij} = C_1(i, j)C_2(i, j)$ . Finally  $\text{vec}(C)$  denotes the vectorization of the matrix  $C$ .

For vectors the Euclidean norm is denoted as  $\|\cdot\|_2$  associated with the inner product  $\langle \cdot, \cdot \rangle$ . For a vector  $\mathbf{x} \in \mathbb{R}^N$  the operator  $\text{diag}(\mathbf{x})$  denotes the diagonal matrix defined with the values of  $\mathbf{x}$ . If  $\mathbf{M} \in S_N(\mathbb{R})$  is a positive semi-definite matrix we note  $\|\cdot\|_{\mathbf{M}}$  the pseudo-norm defined for  $\mathbf{x} \in \mathbb{R}^N$  by  $\|\mathbf{x}\|_{\mathbf{M}}^2 = \mathbf{x}^\top \mathbf{M} \mathbf{x}$ . By some abuse of terminology we will use the term Mahalanobis distance to refer to generalized quadratic distances defined as  $d_{\mathbf{M}}(\mathbf{x}, \mathbf{y}) = \|\mathbf{x} - \mathbf{y}\|_{\mathbf{M}}$ . The fact that  $\mathbf{M}$  is positive semi-definite ensures that  $d_{\mathbf{M}}$  satisfies the properties of a pseudo-distance.

For a 4-D tensor  $\mathbf{L} = (L_{ijkl})_{ijkl}$  we note  $\otimes$  the tensor-matrix multiplication, i.e. given a matrix  $C, \mathbf{L} \otimes \mathbf{A}$  is the matrix  $(\sum_{k,l} L_{i,j,k,l} A_{k,l})_{i,j}$ .

The simplex of histograms (or *weights*) with  $N$  bins is  $\Sigma_N := \{\mathbf{h} \in \mathbb{R}_N^+ \mid \sum_i h_i = 1\}$ . For two histograms  $\mathbf{h}^X \in \Sigma_{N^X}, \mathbf{h}^Y \in \Sigma_{N^Y}$  the set  $\mathcal{U}(\mathbf{h}^X, \mathbf{h}^Y) := \{\mathbf{T} \in \mathbb{R}_+^{N^X \times N^Y} \mid \mathbf{T} \mathbf{1}_{N^Y} = \mathbf{h}^X, \mathbf{T}^\top \mathbf{1}_{N^X} = \mathbf{h}^Y\}$  is the set of couplings between  $\mathbf{h}^X, \mathbf{h}^Y$ .

Recall that for two graphs  $G^X = (C^X, \mathbf{h}^X)$  and  $G^Y = (C^Y, \mathbf{h}^Y)$  the  $GW_2$  distance between  $G^X$  and  $G^Y$  is defined as the result of the following optimization problem:

$$\min_{\mathbf{T} \in \mathcal{U}(\mathbf{h}^X, \mathbf{h}^Y)} \sum_{ijkl} (C_{ij}^X - C_{kl}^Y)^2 T_{ik} T_{jl} \quad (1)$$

In the following we denote by  $GW_2(C^X, C^Y, \mathbf{h}^X, \mathbf{h}^Y)$  the optimal value of equation 1 or by  $GW_2(C^X, C^Y)$  when the weights are uniform. With more compact notations:

$$GW_2(C^X, C^Y, \mathbf{h}^X, \mathbf{h}^Y) = \min_{\mathbf{T} \in \mathcal{U}(\mathbf{h}^X, \mathbf{h}^Y)} \langle \mathbf{L}(C^X, C^Y) \otimes \mathbf{T}, \mathbf{T} \rangle_F \quad (2)$$

where  $\mathbf{L}(C^X, C^Y)$  is the 4-D tensor  $\mathbf{L}(C^X, C^Y) = ((C_{ij}^X - C_{kl}^Y)^2)_{ijkl}$

For graphs with attributes we use the Fused Gromov-Wasserstein distance (Vayer et al., 2019). More precisely consider two graphs  $G^X = (C^X, \mathbf{A}^X, \mathbf{h}^X)$  and  $G^Y = (C^Y, \mathbf{A}^Y, \mathbf{h}^Y)$  where  $\mathbf{A}^X = (\mathbf{a}_i^X)_{i \in [N^X]} \in \mathbb{R}^{N^X \times d}, \mathbf{A}^Y = (\mathbf{a}_j^Y)_{j \in [N^Y]} \in \mathbb{R}^{N^Y \times d}$  are the matrices of all features. Given  $\alpha \in [0, 1]$  and a cost function  $c: \mathbb{R}^d \times \mathbb{R}^d \rightarrow \mathbb{R}$  between vectors in  $\mathbb{R}^d$  the  $FGW_2$  distance is defined as the result of the following optimization problem:

$$\min_{\mathbf{T} \in \mathcal{U}(\mathbf{h}^X, \mathbf{h}^Y)} (1 - \alpha) \sum_{ij} c(\mathbf{a}_i^X, \mathbf{a}_j^Y) T_{ij} + \alpha \sum_{ijkl} (C_{ij}^X - C_{kl}^Y)^2 T_{ik} T_{jl} \quad (3)$$

In the following we note  $FGW_{2,\alpha}(C^X, \mathbf{A}^X, C^Y, \mathbf{A}^Y, \mathbf{h}^X, \mathbf{h}^Y)$  the optimal value of equation 3 or by  $FGW_{2,\alpha}(C^X, \mathbf{A}^X, C^Y, \mathbf{A}^Y)$  when the weights are uniform. The term  $\sum_{ij} c(\mathbf{a}_i^X, \mathbf{a}_j^Y) T_{ij}$  will be called the *Wasserstein objective* and denoted as  $\mathcal{F}(\mathbf{A}^X, \mathbf{A}^Y, \mathbf{T})$  and the term  $\sum_{ijkl} (C_{ij}^X - C_{kl}^Y)^2 T_{ik} T_{jl}$  will be called the *Gromov-Wasserstein objective* and denoted  $\mathcal{E}(C^X, C^Y, \mathbf{T})$ .

## 2. Proofs of the different results

### 2.1. (F)GW upper-bounds in the embedding space

**Proposition 1 (Gromov-Wasserstein)** For two embedded graphs with embeddings  $\mathbf{w}^{(1)}$  and  $\mathbf{w}^{(2)}$  over the set of pairwise relation matrices  $\{\overline{\mathbf{C}}_s\}_{s \in [S]} \subset S_N(\mathbb{R})$ , with a shared masses vector  $\mathbf{h}$ , the following inequality holds

$$GW_2 \left( \sum_{s \in [S]} w_s^{(1)} \overline{\mathbf{C}}_s, \sum_{s \in [S]} w_s^{(2)} \overline{\mathbf{C}}_s \right) \leq \|\mathbf{w}^{(1)} - \mathbf{w}^{(2)}\|_{\mathbf{M}} \quad (4)$$

where  $\mathbf{M} = (\langle \mathbf{D}_h \overline{\mathbf{C}}_p, \overline{\mathbf{C}}_q \mathbf{D}_h \rangle_F)_{pq}$  and  $\mathbf{D}_h = \text{diag}(\mathbf{h})$ .  $\mathbf{M}$  is a positive semi-definite matrix hence engenders a Mahalanobis distance between embeddings.

**Proof.** Let consider the formulation of the GW distance as a Frobenius inner product (see e.g (Peyré et al., 2016)). Denoting  $\mathbf{T}$  the optimal transport plan between both embedded graph and the power operation over matrices applied at entries level,

$$GW_2(\sum_s w_s^{(1)} \overline{\mathbf{C}}_s, \sum_s w_s^{(2)} \overline{\mathbf{C}}_s, \mathbf{h}) = \langle (\sum_s w_s^{(1)} \overline{\mathbf{C}}_s)^2 \mathbf{h} \mathbf{1}_N^\top + \mathbf{1}_N \mathbf{h}^\top (\sum_s w_s^{(2)} \overline{\mathbf{C}}_s^\top)^2 - 2(\sum_s w_s^{(1)} \overline{\mathbf{C}}_s) \mathbf{T} (\sum_s w_s^{(2)} \overline{\mathbf{C}}_s^\top), \mathbf{T} \rangle_F \quad (5)$$

Using the marginal constraints of GW problem, i.e  $\mathbf{T} \in \mathcal{U}(\mathbf{h}, \mathbf{h}) := \{\mathbf{T} \in \mathbb{R}_+^{N \times N} | \mathbf{T} \mathbf{1}_N = \mathbf{h}, \mathbf{T}^\top \mathbf{1}_N = \mathbf{h}\}$ , and the symmetry of matrices  $\{\overline{\mathbf{C}}_s\}$ , equation 5 can be developed as follow,

$$GW_2(\sum_s w_s^{(1)} \overline{\mathbf{C}}_s, \sum_s w_s^{(2)} \overline{\mathbf{C}}_s, \mathbf{h}) = \sum_{pq} \text{tr} \left( w_p^{(1)} w_q^{(1)} (\overline{\mathbf{C}}_p \odot \overline{\mathbf{C}}_q) \mathbf{h} \mathbf{h}^\top + w_p^{(2)} w_q^{(2)} (\overline{\mathbf{C}}_p \odot \overline{\mathbf{C}}_q) \mathbf{h} \mathbf{h}^\top - 2w_p^{(1)} w_q^{(2)} \overline{\mathbf{C}}_p \mathbf{T} \overline{\mathbf{C}}_q^\top \right) \quad (6)$$

With the following property of the trace operator:

$$\text{tr}((\mathbf{C}_1 \odot \mathbf{C}_2) \mathbf{x} \mathbf{x}^\top) = \text{tr}(\mathbf{C}_1^\top \text{diag}(\mathbf{x}) \mathbf{C}_2 \text{diag}(\mathbf{x})) \quad (7)$$

Denoting  $\mathbf{D}_h = \text{diag}(\mathbf{h})$ , equation 6 can be expressed as:

$$GW_2(\sum_p w_p^{(1)} \overline{\mathbf{C}}_p, \sum_q w_q^{(2)} \overline{\mathbf{C}}_q, \mathbf{h}) = \sum_{pq} (w_p^{(1)} w_q^{(1)} + w_p^{(2)} w_q^{(2)}) \langle \mathbf{D}_h \overline{\mathbf{C}}_p, \overline{\mathbf{C}}_q \mathbf{D}_h \rangle_F - 2w_p^{(1)} w_q^{(2)} \langle \mathbf{T}^\top \overline{\mathbf{C}}_p, \overline{\mathbf{C}}_q \mathbf{T}^\top \rangle_F \quad (8)$$

As  $\mathbf{T} \in \mathcal{U}(\mathbf{h}, \mathbf{h})$  is a minimum of the GW objective, we can bound by above equation 6 by evaluating the GW objective in  $\mathbf{D}_h \in \mathcal{U}(\mathbf{h}, \mathbf{h})$ , which is a sub-optimal admissible coupling.

$$\begin{aligned} GW_2(\sum_p w_p^{(1)} \overline{\mathbf{C}}_p, \sum_q w_q^{(2)} \overline{\mathbf{C}}_q, \mathbf{h}) &\leq \sum_{pq} (w_p^{(1)} w_q^{(1)} + w_p^{(2)} w_q^{(2)} - 2w_p^{(1)} w_q^{(2)}) \langle \mathbf{D}_h \overline{\mathbf{C}}_p, \overline{\mathbf{C}}_q \mathbf{D}_h \rangle_F \\ &= \mathbf{w}^{(1)\top} \mathbf{M} \mathbf{w}^{(1)} + \mathbf{w}^{(2)\top} \mathbf{M} \mathbf{w}^{(2)} - 2\mathbf{w}^{(1)\top} \mathbf{M} \mathbf{w}^{(2)} \end{aligned} \quad (9)$$

with  $\mathbf{M} = (\langle \mathbf{D}_h \overline{\mathbf{C}}_p, \overline{\mathbf{C}}_q \mathbf{D}_h \rangle_F)_{pq}$ . It suffices to prove that the matrix  $\mathbf{M}$  is a PSD matrix to conclude that it defines a Mahalanobis distance over the set of embeddings  $\mathbf{w}$  which bounds by above the GW distance between corresponding embedded graphs. Let consider the following reformulation of an entry  $M_{pq}$  as follow,

$$\langle \mathbf{D}_h \overline{\mathbf{C}}_p, \overline{\mathbf{C}}_q \mathbf{D}_h \rangle = \text{vec}(\mathbf{B}_p)^\top \text{vec}(\mathbf{B}_q) \quad (10)$$

where  $\forall n \in [S], \mathbf{B}_n = \mathbf{D}_h^{1/2} \overline{\mathbf{C}}_n \mathbf{D}_h^{1/2}$ . Hence with  $\mathbf{B} = (\mathbf{B}_n)_n \subset \mathbb{R}^{N^2 \times S}$ ,  $\mathbf{M}$  can be factorized as  $\mathbf{B}^\top \mathbf{B}$  and therefore is a PSD matrix.  $\square$

A similar result can be proven for the Fused Gromov-Wasserstein distance:

**Proposition 2 (Fused Gromov-Wasserstein)** For two embedded graphs with node attributes, with embeddings  $\mathbf{w}^{(1)}$  and  $\mathbf{w}^{(2)}$  over the set of pairwise relation matrices  $\{(\overline{\mathbf{C}}_s, \overline{\mathbf{A}}_s)\}_{s \in [S]} \subset S_N(\mathbb{R}) \times \mathbb{R}^{N \times dd}$ , and a shared masses vector  $\mathbf{h}$ , the following inequality holds  $\forall \alpha \in (0, 1)$ ,

$$FGW_{2,\alpha} \left( \tilde{\mathbf{C}}(\mathbf{w}^{(1)}), \tilde{\mathbf{A}}(\mathbf{w}^{(1)}), \tilde{\mathbf{C}}(\mathbf{w}^{(2)}), \tilde{\mathbf{A}}(\mathbf{w}^{(2)}) \right) \leq \|\mathbf{w}^{(1)} - \mathbf{w}^{(2)}\|_{\alpha \mathbf{M}_1 + (1-\alpha) \mathbf{M}_2} \quad (11)$$

with,

$$\tilde{\mathbf{C}}(\mathbf{w}) = \sum_s w_s \overline{\mathbf{C}_s} \quad \text{and} \quad \tilde{\mathbf{A}}(\mathbf{w}) = \sum_s w_s \overline{\mathbf{A}_s} \quad (12)$$

Where  $M_1 = (\langle \mathbf{D}_h \overline{\mathbf{C}_p}, \overline{\mathbf{C}_q} \mathbf{D}_h \rangle_F)_{pq}$  and  $M_2 = (\langle \mathbf{D}_h^{1/2} \overline{\mathbf{A}_p}, \mathbf{D}_h^{1/2} \overline{\mathbf{A}_q} \rangle_F)_{pq \in [S]}$ , and  $\mathbf{D}_h = \text{diag}(\mathbf{h})$ , are PSD matrices and therefore their linear combination being PSD engender Mahalanobis distances over the unmixing space.

**Proof.** Let consider the optimal transport plan  $\mathbf{T} \in \mathcal{U}(\mathbf{h}, \mathbf{h})$  of the FGW distance between both embedded structures.

$$FGW_{2,\alpha}^2 \left( \tilde{\mathbf{C}}(\mathbf{w}^{(1)}), \tilde{\mathbf{A}}(\mathbf{w}^{(1)}), \tilde{\mathbf{C}}(\mathbf{w}^{(2)}), \tilde{\mathbf{A}}(\mathbf{w}^{(2)}), \mathbf{h} \right) = \alpha \mathcal{E} \left( \tilde{\mathbf{C}}(\mathbf{w}^{(1)}), \tilde{\mathbf{C}}(\mathbf{w}^{(2)}), \mathbf{T} \right) + (1 - \alpha) \mathcal{F} \left( \tilde{\mathbf{A}}(\mathbf{w}^{(1)}), \tilde{\mathbf{A}}(\mathbf{w}^{(2)}), \mathbf{T} \right) \quad (13)$$

where  $\mathcal{E}$  and  $\mathcal{F}$  denotes respectively the Gromov-Wasserstein objective and the Wasserstein objective. As a similar approach than for Proposition 4 can be used for the GW objective involved in equation 13, we will first highlight a suitable factorization of the Wasserstein objective  $\mathcal{F}$ . Note that for any feature matrices  $\mathbf{A}_1 = (\mathbf{a}_{1,i})_{i \in [N]}$ ,  $\mathbf{A}_2 = (\mathbf{a}_{2,i})_{i \in [N]} \in \mathbb{R}^{N \times d}$ ,  $\mathcal{F}$  with an euclidean ground cost can be expressed as follow using the marginal constraints on  $\mathbf{T} \in \mathcal{U}(\mathbf{h}, \mathbf{h})$ ,

$$\begin{aligned} \mathcal{F}(\mathbf{A}_1, \mathbf{A}_2, \mathbf{T}) &= \sum_{ij} \|\mathbf{a}_{1,i} - \mathbf{a}_{2,j}\|_2^2 T_{ij} \\ &= \sum_i \|\mathbf{a}_{1,i}\|_2^2 h_i + \sum_j \|\mathbf{a}_{1,j}\|_2^2 h_j - 2 \sum_{ij} \langle \mathbf{a}_{1,i}, \mathbf{a}_{2,j} \rangle T_{ij} \\ &= \langle \mathbf{D}_h^{1/2} \mathbf{A}_1, \mathbf{D}_h^{1/2} \mathbf{A}_1 \rangle_F + \langle \mathbf{D}_h^{1/2} \mathbf{A}_2, \mathbf{D}_h^{1/2} \mathbf{A}_2 \rangle_F - 2 \langle \mathbf{A}_1 \mathbf{A}_2^\top, \mathbf{T} \rangle_F \end{aligned} \quad (14)$$

Returning to our main problem 13, a straight-forward development of its Wasserstein term  $\mathcal{F}$  using equation 14 leads to the following equality,

$$\mathcal{F} \left( \tilde{\mathbf{A}}(\mathbf{w}^{(1)}), \tilde{\mathbf{A}}(\mathbf{w}^{(2)}), \mathbf{T} \right) = \sum_{pq} \left( w_p^{(1)} w_q^{(1)} + w_p^{(2)} w_q^{(2)} \right) \langle \mathbf{D}_h^{1/2} \overline{\mathbf{A}_p}, \mathbf{D}_h^{1/2} \overline{\mathbf{A}_q} \rangle_F - 2 w_p^{(1)} w_q^{(2)} \langle \mathbf{A}_p \mathbf{A}_q^\top, \mathbf{T} \rangle_F \quad (15)$$

Similarly than for the proof of Proposition 1,  $\mathbf{T} \in \mathcal{U}(\mathbf{h}, \mathbf{h})$  is an optimal admissible coupling minimizing the FGW problem, thus equation 13 is upper bounded by its evaluation in the sub-optimal admissible coupling  $\mathbf{D}_h \in \mathcal{U}(\mathbf{h}, \mathbf{h})$ . Let  $M_1 = M = (\langle \mathbf{D}_h \overline{\mathbf{C}_p}, \overline{\mathbf{C}_q} \mathbf{D}_h \rangle_F)_{pq}$  the PSD matrix coming from the proof of Proposition 1.

Let  $M_2 = (\langle \mathbf{D}_h^{1/2} \overline{\mathbf{A}_p}, \mathbf{D}_h^{1/2} \overline{\mathbf{A}_q} \rangle_F)_{pq}$  which is also a PSD matrix as it can be factorized as  $\mathbf{B}^\top \mathbf{B}$  with  $\mathbf{B} = (\text{vec}(\mathbf{D}_h^{1/2} \mathbf{A}_s))_{s \in [S]} \in \mathbb{R}^{N \times S}$ .

Let us denote  $\forall \alpha \in (0, 1)$ ,  $M_\alpha = \alpha M_1 + (1 - \alpha) M_2$  which is PSD as convex combination of PSD matrices, hence engender a Mahalanobis distance in the embedding space. To summarize, equation 16 holds  $\forall \alpha \in (0, 1)$ ,

$$\begin{aligned} FGW_{2,\alpha}^2 \left( \tilde{\mathbf{C}}(\mathbf{w}^{(1)}), \tilde{\mathbf{A}}(\mathbf{w}^{(1)}), \tilde{\mathbf{C}}(\mathbf{w}^{(2)}), \tilde{\mathbf{A}}(\mathbf{w}^{(2)}), \mathbf{h} \right) &\leq \mathbf{w}^{(1)\top} M_\alpha \mathbf{w}^{(1)} + \mathbf{w}^{(2)\top} M_\alpha \mathbf{w}^{(2)} - 2 \mathbf{w}^{(1)\top} M_\alpha \mathbf{w}^{(2)} \\ &= \|\mathbf{w}^{(1)} - \mathbf{w}^{(2)}\|_{M_\alpha} \quad \square \end{aligned} \quad (16)$$

## 2.2. Proposition 3. Gradients of GW w.r.t. the weights

In this section we will prove the following result:

**Proposition 3** Let  $(\mathcal{C}^1, \mathbf{h}^1)$  and  $(\mathcal{C}^2, \mathbf{h}^2)$  be two graphs. Let  $\mathbf{T}^*$  be an optimal coupling of the GW problem between  $(\mathcal{C}^1, \mathbf{h}^1)$ ,  $(\mathcal{C}^2, \mathbf{h}^2)$ . We define the following cost matrix  $\mathbf{M}(\mathbf{T}^*) := \left( \sum_{kl} (C_{ik}^1 - C_{jl}^2)^2 T_{kl}^* \right)_{ij}$ . Let  $\alpha^*(\mathbf{T}^*)$ ,  $\beta^*(\mathbf{T}^*)$  be the dual variables of the following linear OT problem:

$$\min_{\mathbf{T} \in \mathcal{U}(\mathbf{h}^1, \mathbf{h}^2)} \langle \mathbf{M}(\mathbf{T}^*), \mathbf{T} \rangle_F$$

Then  $\alpha^*(\mathbf{T}^*)$  (resp  $\beta^*(\mathbf{T}^*)$ ) is a subgradient of the function  $GW_2^2(\mathcal{C}^1, \mathcal{C}^2, \cdot, \mathbf{h}^2)$  (resp  $GW_2^2(\mathcal{C}^1, \mathcal{C}^2, \mathbf{h}^1, \cdot)$ ).

In the following  $\mathbf{T} \geq 0$  should be understood as  $\forall i, j T_{ij} \geq 0$ . Let  $(\mathbf{C}^1, \mathbf{h}^1)$  and  $(\mathbf{C}^2, \mathbf{h}^2)$  be two graphs of order  $n$  and  $m$  with  $\mathbf{C}^1 \in S_n(\mathbb{R})$ ,  $\mathbf{C}^2 \in S_m(\mathbb{R})$  and  $(\mathbf{h}^1, \mathbf{h}^2) \in \Sigma_n \times \Sigma_m$ . Let  $\mathbf{T}^*$  be an optimal solution of the GW problem i.e.  $GW_2(\mathbf{C}^1, \mathbf{C}^2, \mathbf{h}^1, \mathbf{h}^2) = \langle \mathbf{L}(\mathbf{C}^1, \mathbf{C}^2) \otimes \mathbf{T}^*, \mathbf{T}^* \rangle_F$ . We define  $\mathbf{M}(\mathbf{T}^*) := \mathbf{L}(\mathbf{C}^1, \mathbf{C}^2) \otimes \mathbf{T}^*$ . We consider the problem:

$$\min_{\mathbf{T} \in \mathcal{U}(\mathbf{h}^1, \mathbf{h}^2)} \langle \mathbf{M}(\mathbf{T}^*), \mathbf{T} \rangle_F = \min_{\mathbf{T} \in \mathcal{U}(\mathbf{h}^1, \mathbf{h}^2)} \langle \mathbf{L}(\mathbf{C}^1, \mathbf{C}^2) \otimes \mathbf{T}^*, \mathbf{T} \rangle_F \quad (17)$$

We will first show that the optimal coupling for the Gromov-Wasserstein problem is also an optimal coupling for the problem equation 17, i.e.  $\min_{\mathbf{T} \in \mathcal{U}(\mathbf{h}^1, \mathbf{h}^2)} \langle \mathbf{M}(\mathbf{T}^*), \mathbf{T} \rangle_F = \langle \mathbf{M}(\mathbf{T}^*), \mathbf{T}^* \rangle_F$ . This result is based on the following theorem which relates a solution of a Quadratic Program (QP) with a solution of a Linear Program (LP):

**Theorem 1 (Theorem 1.12 in (Murty, 1988))** Consider the following (QP):

$$\begin{aligned} \min_{\mathbf{x}} f(\mathbf{x}) &= \mathbf{c}\mathbf{x} + \mathbf{x}^T \mathbf{Q}\mathbf{x} \\ \text{s.t.} & \mathbf{A}\mathbf{x} = \mathbf{b}, \mathbf{x} \geq 0 \end{aligned} \quad (18)$$

Then if  $\mathbf{x}_*$  is an optimal solution of equation 18 it is an optimal solution of the following (LP):

$$\begin{aligned} \min_{\mathbf{x}} f(\mathbf{x}) &= (\mathbf{c} + \mathbf{x}_*^T \mathbf{Q})\mathbf{x} \\ \text{s.t.} & \mathbf{A}\mathbf{x} = \mathbf{b}, \mathbf{x} \geq 0 \end{aligned} \quad (19)$$

Applying Theorem 1 to our case gives exactly that:

$$\mathbf{T}^* \in \arg \min_{\mathbf{T} \in \mathcal{U}(\mathbf{h}^1, \mathbf{h}^2)} \langle \mathbf{M}(\mathbf{T}^*), \mathbf{T} \rangle_F \quad (20)$$

since  $\mathbf{T}^*$  is an optimal solution of the GW problem and so  $\min_{\mathbf{T} \in \mathcal{U}(\mathbf{h}^1, \mathbf{h}^2)} \langle \mathbf{M}(\mathbf{T}^*), \mathbf{T} \rangle_F = \langle \mathbf{M}(\mathbf{T}^*), \mathbf{T}^* \rangle_F$ .

Now let  $\alpha^*(\mathbf{T}^*), \beta^*(\mathbf{T}^*)$  be an optimal solution to the dual problem of equation 17. Then by strong duality it implies that:

$$\min_{\mathbf{T} \in \mathcal{U}(\mathbf{h}^1, \mathbf{h}^2)} \langle \mathbf{M}(\mathbf{T}^*), \mathbf{T} \rangle_F = \langle \alpha^*(\mathbf{T}^*), \mathbf{h}^1 \rangle + \langle \beta^*(\mathbf{T}^*), \mathbf{h}^2 \rangle = \langle \mathbf{M}(\mathbf{T}^*), \mathbf{T}^* \rangle_F \quad (21)$$

Since  $\langle \mathbf{M}(\mathbf{T}^*), \mathbf{T}^* \rangle_F = GW_2(\mathbf{C}^1, \mathbf{C}^2, \mathbf{h}^1, \mathbf{h}^2)$  we have:

$$GW_2(\mathbf{C}^1, \mathbf{C}^2, \mathbf{h}^1, \mathbf{h}^2) = \langle \alpha^*(\mathbf{T}^*), \mathbf{h}^1 \rangle + \langle \beta^*(\mathbf{T}^*), \mathbf{h}^2 \rangle \quad (22)$$

To prove Proposition 3 the objective is to show that  $\beta^*(\mathbf{T}^*)$  is a subgradient of  $F : \mathbf{q} \rightarrow GW(\mathbf{C}^1, \mathbf{C}^2, \mathbf{h}^1, \mathbf{q})$  (by symmetry the result will be true for  $\alpha^*(\mathbf{T}^*)$ ). In other words we want to prove that:

$$\forall \mathbf{q} \in \Sigma_m, \langle \beta^*(\mathbf{T}^*), \mathbf{q} \rangle - \langle \beta^*(\mathbf{T}^*), \mathbf{h}^2 \rangle \leq F(\mathbf{q}) - F(\mathbf{h}^2) \quad (23)$$

This condition can be rewritten based on the following simple lemma:

**Lemma 1** The dual variable  $\beta^*(\mathbf{T}^*)$  is a subgradient of  $F : \mathbf{q} \rightarrow GW_2(\mathbf{C}^1, \mathbf{C}^2, \mathbf{h}^1, \mathbf{q})$  if and only if:

$$\forall \mathbf{q} \in \Sigma_m, \langle \beta^*(\mathbf{T}^*), \mathbf{q} \rangle + \langle \alpha^*(\mathbf{T}^*), \mathbf{h}^1 \rangle \leq F(\mathbf{q}) \quad (24)$$

**Proof.** It is a subgradient if and only if:

$$\forall \mathbf{q} \in \Sigma_m, \langle \beta^*(\mathbf{T}^*), \mathbf{q} \rangle - \langle \beta^*(\mathbf{T}^*), \mathbf{h}^2 \rangle \leq F(\mathbf{q}) - F(\mathbf{h}^2) \quad (25)$$

However using equation 22 and the definition of  $F$  we have:

$$F(\mathbf{h}^2) = \langle \alpha^*(\mathbf{T}^*), \mathbf{h}^1 \rangle + \langle \beta^*(\mathbf{T}^*), \mathbf{h}^2 \rangle \quad (26)$$

So overall:

$$\begin{aligned} \langle \beta^*(\mathbf{T}^*), \mathbf{q} \rangle - \langle \beta^*(\mathbf{T}^*), \mathbf{h}^2 \rangle &\leq F(\mathbf{q}) - (\langle \alpha^*(\mathbf{T}^*), \mathbf{h}^1 \rangle + \langle \beta^*(\mathbf{T}^*), \mathbf{h}^2 \rangle) \\ \iff \langle \beta^*(\mathbf{T}^*), \mathbf{q} \rangle + \langle \alpha^*(\mathbf{T}^*), \mathbf{h}^1 \rangle &\leq F(\mathbf{q}) \end{aligned} \quad (27)$$

□

In order to prove Proposition 3 we have to prove that the condition in Lemma 1 is satisfied. We will do so by leveraging the weak-duality of the GW problem as described in the next lemma:

**Lemma 2** For any vectors  $\alpha \in \mathbb{R}^n, \beta \in \mathbb{R}^m$  we define:

$$\mathcal{G}(\alpha, \beta) := \min_{T \geq 0} \langle \mathbf{L}(\mathbf{C}^1, \mathbf{C}^2) \otimes T - \alpha \mathbf{1}_m^\top - \mathbf{1}_n \beta^\top, T \rangle$$

Let  $T^*$  be an optimal solution of the GW problem. Consider:

$$\min_{T \in \mathcal{U}(\mathbf{h}^1, \mathbf{h}^2)} \langle M(T^*), T \rangle_F \quad (28)$$

where  $M(T^*) := \mathbf{L}(\mathbf{C}^1, \mathbf{C}^2) \otimes T^*$ . Let  $\alpha^*(T^*), \beta^*(T^*)$  be the dual variables of the problem in equation 28. If  $\mathcal{G}(\alpha^*(T^*), \beta^*(T^*)) = 0$  then  $\beta^*(T^*)$  is a subgradient of  $F : \mathbf{q} \rightarrow GW_2(\mathbf{C}^1, \mathbf{C}^2, \mathbf{h}^1, \mathbf{q})$

**Proof.** Let  $\mathbf{q} \in \Sigma_m$  be any weights vector be fixed. Recall that  $F : \mathbf{q} \rightarrow GW_2(\mathbf{C}^1, \mathbf{C}^2, \mathbf{h}^1, \mathbf{q})$  so that:

$$F(\mathbf{q}) = GW_2(\mathbf{C}^1, \mathbf{C}^2, \mathbf{h}^1, \mathbf{q}) = \min_{T \in \mathcal{U}(\mathbf{h}^1, \mathbf{q})} \langle \mathbf{L}(\mathbf{C}^1, \mathbf{C}^2) \otimes T, T \rangle \quad (29)$$

The Lagrangian associated to equation 29 reads:

$$\min_{T \geq 0} \max_{\alpha, \beta} \mathbb{L}(T, \alpha, \beta) \text{ where } \mathbb{L}(T, \alpha, \beta) := \langle \mathbf{L}(\mathbf{C}^1, \mathbf{C}^2) \otimes T, T \rangle + \langle \mathbf{h}^1 - T \mathbf{1}_m, \alpha \rangle + \langle \mathbf{q} - T^\top \mathbf{1}_n, \beta \rangle \quad (30)$$

Moreover by weak Lagrangian duality:

$$\min_{T \geq 0} \max_{\alpha, \beta} \mathbb{L}(T, \alpha, \beta) \geq \max_{\alpha, \beta} \min_{T \geq 0} \mathbb{L}(T, \alpha, \beta) \quad (31)$$

However:

$$\begin{aligned} \max_{\alpha, \beta} \min_{T \geq 0} \mathbb{L}(T, \alpha, \beta) &= \max_{\alpha, \beta} \langle \alpha, \mathbf{h}^1 \rangle + \langle \beta, \mathbf{q} \rangle + \min_{T \geq 0} \langle \mathbf{L}(\mathbf{C}^1, \mathbf{C}^2) \otimes T - \alpha \mathbf{1}_m^\top - \mathbf{1}_n \beta^\top, T \rangle \\ &= \max_{\alpha, \beta} \langle \alpha, \mathbf{h}^1 \rangle + \langle \beta, \mathbf{q} \rangle + \mathcal{G}(\alpha, \beta) \end{aligned}$$

So by considering the dual variable  $\alpha^*(T^*), \beta^*(T^*)$  defined previously we have:

$$\max_{\alpha, \beta} \min_{T \geq 0} \mathbb{L}(T, \alpha, \beta) \geq \langle \alpha^*(T^*), \mathbf{h}^1 \rangle + \langle \beta^*(T^*), \mathbf{q} \rangle + \mathcal{G}(\alpha^*(T^*), \beta^*(T^*)) \quad (32)$$

Now combining equation 31 and equation 32 we have:

$$\min_{T \geq 0} \max_{\alpha, \beta} \mathbb{L}(T, \alpha, \beta) \geq \langle \alpha^*(T^*), \mathbf{h}^1 \rangle + \langle \beta^*(T^*), \mathbf{q} \rangle + \mathcal{G}(\alpha^*(T^*), \beta^*(T^*)) \quad (33)$$

Since  $F(\mathbf{q}) = \min_{T \geq 0} \max_{\alpha, \beta} \mathbb{L}(T, \alpha, \beta)$  we have proven that:

$$\forall \mathbf{q} \in \Sigma_m, \langle \beta^*(T^*), \mathbf{q} \rangle + \langle \alpha^*(T^*), \mathbf{h}^1 \rangle + \mathcal{G}(\alpha^*(T^*), \beta^*(T^*)) \leq F(\mathbf{q}) \quad (34)$$

However Lemma 1 states that  $\beta^*(T^*)$  is a subgradient of  $F$  if and only if:

$$\forall \mathbf{q} \in \Sigma_m, \langle \beta^*(T^*), \mathbf{q} \rangle + \langle \alpha^*(T^*), \mathbf{h}^1 \rangle \leq F(\mathbf{q}) \quad (35)$$

So combining equation 34 with Lemma 1 proves:

$$\mathcal{G}(\alpha^*(T^*), \beta^*(T^*)) \geq 0 \implies \beta^*(T^*) \text{ is a subgradient of } F \quad (36)$$

However we have  $F(\mathbf{h}^2) = \langle \alpha^*(T^*), \mathbf{h}^1 \rangle + \langle \beta^*(T^*), \mathbf{h}^2 \rangle$  by equation 26. So  $\mathcal{G}(\alpha^*(T^*), \beta^*(T^*)) \leq 0$  using equation 34 with  $\mathbf{q} = \mathbf{h}^2$ . So we can only hope to have  $\mathcal{G}(\alpha^*(T^*), \beta^*(T^*)) = 0$ .  $\square$

The previous lemma states that it is sufficient to look at the quantity  $\mathcal{G}(\alpha^*(T^*), \beta^*(T^*))$  in order to prove that  $\beta^*(T^*)$  is a subgradient of  $F$ . Interestingly the condition  $\mathcal{G}(\alpha^*(T^*), \beta^*(T^*)) = 0$  is satisfied which proves Proposition 3 as stated in the next lemma:

**Lemma 3** With previous notations we have  $\mathcal{G}(\alpha^*(T^*), \beta^*(T^*)) = 0$ . In particular  $\beta^*(T^*)$  is a subgradient of  $F$  so that Proposition 3 is valid.

**Proof.** We want to find:

$$\mathcal{G}(\alpha^*(\mathbf{T}^*), \beta^*(\mathbf{T}^*)) = \min_{\mathbf{T} \geq 0} \langle \mathbf{L}(\mathbf{C}^1, \mathbf{C}^2) \otimes \mathbf{T} - \alpha^*(\mathbf{T}^*) \mathbf{1}_m^\top - \mathbf{1}_n \beta^*(\mathbf{T}^*)^\top, \mathbf{T} \rangle$$

We define  $H(\mathbf{T}) := \langle \mathbf{L}(\mathbf{C}^1, \mathbf{C}^2) \otimes \mathbf{T} - \alpha^*(\mathbf{T}^*) \mathbf{1}_m^\top - \mathbf{1}_n \beta^*(\mathbf{T}^*)^\top, \mathbf{T} \rangle$ . Since  $\mathbf{T}^*$  is optimal coupling for  $\min_{\mathbf{T} \in \mathcal{U}(\mathbf{h}^1, \mathbf{h}^2)} \langle \mathbf{M}(\mathbf{T}^*), \mathbf{T} \rangle_F$  by equation 20 then for all  $i, j$  we have  $T_{ij}^*(\mathbf{M}(\mathbf{T}^*)_{ij} - \alpha_i^*(\mathbf{T}^*) - \beta_j^*(\mathbf{T}^*)) = 0$  by the property of the optimal couplings for the Wasserstein problems. Equivalently:

$$\forall (i, j) \in [n] \times [m], T_{ij}^*(\mathbf{L}(\mathbf{C}^1, \mathbf{C}^2) \otimes \mathbf{T}^*]_{ij} - \alpha_i^*(\mathbf{T}^*) - \beta_j^*(\mathbf{T}^*) = 0 \quad (37)$$

Then:

$$\begin{aligned} H(\mathbf{T}^*) &= \text{tr} \left( \mathbf{T}^{*\top} (\mathbf{L}(\mathbf{C}^1, \mathbf{C}^2) \otimes \mathbf{T}^* - \alpha^*(\mathbf{T}^*) \mathbf{1}_m^\top - \mathbf{1}_n \beta^*(\mathbf{T}^*)^\top) \right) \\ &= \sum_{ij} T_{ij}^* (\mathbf{L}(\mathbf{C}^1, \mathbf{C}^2) \otimes \mathbf{T}^* - \alpha^*(\mathbf{T}^*) \mathbf{1}_m^\top - \mathbf{1}_n \beta^*(\mathbf{T}^*)^\top)_{ij} \\ &= \sum_{ij} T_{ij}^* ([\mathbf{L}(\mathbf{C}^1, \mathbf{C}^2) \otimes \mathbf{T}^*]_{ij} - \alpha_i^*(\mathbf{T}^*) - \beta_j^*(\mathbf{T}^*)) = 0 \end{aligned} \quad (38)$$

Which proves  $\mathcal{G}(\alpha^*(\mathbf{T}^*), \beta^*(\mathbf{T}^*)) = 0$ .  $\square$

### 3. Algorithmic details

#### 3.1. GDL for graphs without attributes

We propose to model a graph as a weighted sum of pairwise relation matrices. More precisely, given a graph  $G = (\mathbf{C}, \mathbf{h})$  and a dictionary  $\{\bar{\mathbf{C}}_s\}_{s \in [S]} \subset S_N(\mathbb{R})$  we want to find a linear representation  $\sum_{s \in [S]} w_s \bar{\mathbf{C}}_s$  of the graph  $G$ , as faithful as possible. The dictionary is made of pairwise relation matrices of graphs with order  $N$ .  $\mathbf{w} = (w_s)_{s \in [S]} \in \Sigma_S$  is referred as *embedding* and denotes the coordinate of the graph  $G$  in the dictionary. We rely on the GW distance to assess the quality of our linear approximation and propose to minimize it to estimate its optimal embedding.

##### 3.1.1. GROMOV-WASSERSTEIN UNMIXING

We first study the unmixing problem that consists in projecting a graph on the linear representation discussed above, *i.e.* estimate the optimal embedding  $\mathbf{w}$  of a graph  $G$ . Our GW unmixing problem reads as

$$\min_{\mathbf{w} \in \Sigma_S} GW_2^2(\mathbf{C}, \tilde{\mathbf{C}}(\mathbf{w})) - \lambda \|\mathbf{w}\|_2^2 \quad (39)$$

$$\text{where, } \tilde{\mathbf{C}}(\mathbf{w}) = \sum_s w_s \bar{\mathbf{C}}_s \quad (40)$$

where  $\lambda \in \mathbb{R}^+$  induces a **negative** quadratic regularization promoting sparsity on the simplex as discussed in Li et al. (2016). In order to solve the non-convex problem in equation 39, we propose to use a Block Coordinate Descent (BCD) algorithms (Tseng, 2001). We fully detail the algorithm in the following and refer our readers to the main paper for the discussion on this approach.

---

#### Algorithm 1 BCD for GW unmixing problem 39

---

- 1: Initialize  $\mathbf{w} = \frac{1}{S} \mathbf{1}_S$
  - 2: **repeat**
  - 3:   Compute OT matrix  $\mathbf{T}$  of  $GW_2^2(\mathbf{C}, \tilde{\mathbf{C}}(\mathbf{w}))$ , with CG algorithm (Vayer et al., 2018, Alg.1 & 2).
  - 4:   Compute the optimal  $\mathbf{w}$  solving equation 39 for a fixed  $\mathbf{T}$  with CG algorithm 2
  - 5: **until** convergence
-

---

**Algorithm 2** CG for solving GW unmixing problem *w.r.t*  $\mathbf{w}$  given  $\mathbf{T}$ 


---

- 1: **repeat**
- 2: Compute  $\mathbf{g}$ , gradients *w.r.t*  $\mathbf{w}$  of  $\mathcal{E}(\mathbf{C}, \tilde{\mathbf{C}}(\mathbf{w}), \mathbf{T})$  following equation 42.
- 3: Find direction  $\mathbf{x}^* = \arg \min_{\mathbf{x} \in \Sigma_S} \mathbf{x}^T \mathbf{g}$
- 4: Line-search: denoting  $\mathbf{z}(\gamma) = \gamma \mathbf{x}^* + (1 - \gamma) \mathbf{w}$ ,

$$\gamma^* = \arg \min_{\gamma \in (0,1)} \mathcal{E}(\mathbf{C}, \tilde{\mathbf{C}}(\mathbf{z}(\gamma)), \mathbf{T}) = \arg \min_{\gamma \in (0,1)} a\gamma^2 + b\gamma + c \quad (41)$$

- 5:  $\mathbf{w} \leftarrow \mathbf{z}(\gamma^*)$
  - 6: **until** convergence
- 

Partial derivatives of the GW objective  $\mathcal{E}$  *w.r.t*  $\mathbf{w} = (\frac{\partial \mathcal{E}}{\partial w_s})_{s \in [S]}$  are expressed in equation 42, and further completed with gradient of the negative regularization term .

$$\frac{\partial \mathcal{E}}{\partial w_s}(\mathbf{C}, \tilde{\mathbf{C}}(\mathbf{w}), \mathbf{T}) = 2tr\{(\overline{\mathbf{C}}_s \odot \tilde{\mathbf{C}}(\mathbf{w})) \mathbf{h} \mathbf{h}^T - \overline{\mathbf{C}}_s \mathbf{T}^T \mathbf{C}^T \mathbf{T}\} \quad (42)$$

The coefficient of the second-order polynom involved in equation 50 used to solve the problem, are expressed as follow,

$$a = tr\{(\tilde{\mathbf{C}}(\mathbf{x}^* - \mathbf{w}) \odot \tilde{\mathbf{C}}(\mathbf{x}^* - \mathbf{w})) \mathbf{h} \mathbf{h}^T\} - \lambda \|\mathbf{x}^* - \mathbf{w}\|_2^2 \quad (43)$$

$$b = 2tr\{(\tilde{\mathbf{C}}(\mathbf{x}^* - \mathbf{w}) \odot \tilde{\mathbf{C}}(\mathbf{w})) \mathbf{h} \mathbf{h}^T - \tilde{\mathbf{C}}(\mathbf{x}^* - \mathbf{w}) \mathbf{T}^T \mathbf{C}^T \mathbf{T}\} - 2\lambda \langle \mathbf{w}, \mathbf{x} - \mathbf{w} \rangle \quad (44)$$

### 3.1.2. DICTIONARY LEARNING AND ONLINE ALGORITHM

Assume now that the dictionary  $\{\overline{\mathbf{C}}_s\}_{s \in [S]}$  is not known and has to be estimated from the data. We define a dataset of  $K$  graphs  $\{G^{(k)} : (\mathbf{C}^{(k)}, \mathbf{h}^{(k)})\}_{k \in [K]}$ . Recall that each graph  $G^{(k)}$  of order  $N^{(k)}$  is summarized by its pairwise relation matrix  $\mathbf{C}^{(k)} \in S_{N^{(k)}}(\mathbb{R})$  and weights  $\mathbf{h}^{(k)} \in \Sigma_{N^{(k)}}$  over nodes. The DL problem, that aims at estimating the optimal dictionary for a given dataset can be expressed as:

$$\min_{\substack{\{\mathbf{w}^{(k)}\}_{k \in [K]} \\ \{\overline{\mathbf{C}}_s\}_{s \in [S]}}} \sum_{k=1}^K GW_2^2(\mathbf{C}^{(k)}, \tilde{\mathbf{C}}(\mathbf{w}^{(k)})) - \lambda \|\mathbf{w}^{(k)}\|_2^2 \quad (45)$$

where  $\mathbf{w}^{(k)} \in \Sigma_S$ ,  $\overline{\mathbf{C}}_s \in S_N(\mathbb{R})$ . We refer the reader to the main paper for the discussion on the non-convex problem 45. To tackle this problem we proposed a stochastic algorithm 3

---

**Algorithm 3** GDL: stochastic update of atoms  $\{\overline{\mathbf{C}}_s\}_{s \in [S]}$ 


---

- 1: Sample a minibatch of graphs  $\mathcal{B} := \{\mathbf{C}^{(k)}\}_{k \in \mathcal{B}}$ .
- 2: Compute optimal  $\{(\mathbf{w}^{(k)}, \mathbf{T}^{(k)})\}_{k \in [B]}$  by solving  $B$  independent unmixing problems with Alg.1.
- 3: Projected gradient step with estimated gradients  $\tilde{\nabla}_{\overline{\mathbf{C}}_s}$  (see equation 47),  $\forall s \in [S]$ :

$$\overline{\mathbf{C}}_s \leftarrow Proj_{S_N(\mathbb{R})}(\overline{\mathbf{C}}_s - \eta_C \tilde{\nabla}_{\overline{\mathbf{C}}_s}) \quad (46)$$


---

Estimated gradients *w.r.t*  $\{\overline{\mathbf{C}}_s\}$  over a minibatch of graphs  $\mathcal{B} := \{\mathbf{C}^{(k)}\}_{k \in \mathcal{B}}$  given unmixing solutions  $\{(\mathbf{w}^{(k)}, \mathbf{T}^{(k)})\}_{k \in [B]}$  read:

$$\tilde{\nabla}_{\overline{\mathbf{C}}_s} \left( \sum_{k \in \mathcal{B}} \mathcal{E}(\mathbf{C}^{(k)}, \tilde{\mathbf{C}}(\mathbf{w}^{(k)}), \mathbf{T}^{(k)}) \right) = \frac{2}{B} \sum_{k \in \mathcal{B}} w_s^{(k)} \{ \tilde{\mathbf{C}}(\mathbf{w}^{(k)}) \odot \mathbf{h} \mathbf{h}^T - \mathbf{T}^{(k)T} \mathbf{C}^{(k)T} \mathbf{T}^{(k)} \} \quad (47)$$

### 3.2. GDL for graph with nodes attribute

We can also define the same DL procedure for labeled graphs using the FGW distance. The unmixing part defined in equation 39 can be adapted by considering a linear embedding of the similarity matrix *and* of the feature matrix parametrized by the *same*  $\mathbf{w}$ .

---

### 3.2.1. FUSED GROMOV-WASSERSTEIN UNMIXING

More precisely, given a labeled graph  $G = (\mathbf{C}, \mathbf{A}, \mathbf{h})$  (see Section 1) and a dictionary  $\{(\overline{\mathbf{C}}_s, \overline{\mathbf{A}}_s)\}_{s \in [S]} \subset S_N(\mathbb{R}) \times \mathbb{R}^{N \times d}$  we want to find a linear representation  $(\sum_{s \in [S]} w_s \overline{\mathbf{C}}_s, \sum_{s \in [S]} w_s \overline{\mathbf{A}}_s)$  of the labeled graph  $G$ , as faithful as possible in the sense of the FGW distance. The FGW unmixing problem that consists in projecting a labeled graph on the linear representation discussed above reads as follow,  $\forall \alpha \in (0, 1)$ ,

$$\min_{\mathbf{w} \in \Sigma_S} FGW_{2,\alpha}^2(\mathbf{C}, \mathbf{A}, \tilde{\mathbf{C}}(\mathbf{w}), \tilde{\mathbf{A}}(\mathbf{w})) - \lambda \|\mathbf{w}\|_2^2 \quad (48)$$

$$\text{where, } \tilde{\mathbf{C}}(\mathbf{w}) = \sum_s w_s \overline{\mathbf{C}}_s \quad \text{and} \quad \tilde{\mathbf{A}}(\mathbf{w}) = \sum_s w_s \overline{\mathbf{A}}_s \quad (49)$$

where  $\lambda \in \mathbb{R}^+$ . A similar discussion than for the GW unmixing problem 39 holds. We adapt the BCD algorithm detailed in 1 to labeled graphs in Alg.4, to solve the non-convex problem of equation 48.

---

#### Algorithm 4 BCD for FGW unmixing problem 48

---

- 1: Initialize  $\mathbf{w} = \frac{1}{S} \mathbf{1}_S$
  - 2: **repeat**
  - 3:   Compute OT matrix  $\mathbf{T}$  of  $FGW_{2,\alpha}^2(\mathbf{C}, \mathbf{A}, \tilde{\mathbf{C}}(\mathbf{w}), \tilde{\mathbf{A}}(\mathbf{w}))$ , with CG algorithm (Vayer et al., 2018, Alg.1 & 2).
  - 4:   Compute the optimal  $\mathbf{w}$  solving equation 48 for a fixed  $\mathbf{T}$  with CG algorithm 5.
  - 5: **until** convergence
- 

---

#### Algorithm 5 CG for solving FGW unmixing problem w.r.t $\mathbf{w}$ given $\mathbf{T}$

---

- 1: **repeat**
- 2:   Compute  $\mathbf{g}$ , gradients w.r.t  $\mathbf{w}$  of equation 48 given  $\mathbf{T}$  following equation 51.
- 3:   Find direction  $\mathbf{x}^* = \arg \min_{\mathbf{x} \in \Sigma_S} \mathbf{x}^T \mathbf{g}$
- 4:   Line-search: denoting  $\mathbf{z}(\gamma) = \gamma \mathbf{x}^* + (1 - \gamma) \mathbf{w}$ ,

$$\gamma^* = \arg \min_{\gamma \in (0,1)} \alpha \mathcal{E}(\mathbf{C}, \tilde{\mathbf{C}}(\mathbf{z}(\gamma)), \mathbf{T}) + (1 - \alpha) \mathcal{F}(\mathbf{A}, \tilde{\mathbf{A}}(\mathbf{z}(\gamma)), \mathbf{T}) = \arg \min_{\gamma \in (0,1)} a\gamma^2 + b\gamma + c \quad (50)$$

- 5:    $\mathbf{w} \leftarrow \mathbf{z}(\gamma^*)$
  - 6: **until** convergence
- 

Partial derivates of the FGW objective  $\mathcal{G}_\alpha := \alpha \mathcal{E} + (1 - \alpha) \mathcal{F}$  w.r.t  $\mathbf{w}$  are expressed in equations 42 and 51, and further completed with gradient of the negative regularization term.

$$\begin{aligned} \frac{\partial \mathcal{G}_\alpha}{\partial w_s}(\mathbf{C}, \mathbf{A}, \tilde{\mathbf{C}}(\mathbf{w}), \tilde{\mathbf{A}}(\mathbf{w}), \mathbf{T}) &= \alpha \frac{\partial \mathcal{E}}{\partial w_s}(\mathbf{C}, \tilde{\mathbf{C}}(\mathbf{w}), \mathbf{T}) + (1 - \alpha) \frac{\partial \mathcal{F}}{\partial w_s}(\mathbf{A}, \tilde{\mathbf{A}}(\mathbf{w}), \mathbf{T}) \\ &= \alpha \frac{\partial \mathcal{E}}{\partial w_s}(\mathbf{C}, \tilde{\mathbf{C}}(\mathbf{w}), \mathbf{T}) + 2(1 - \alpha) \text{tr}\{\mathbf{D}_h \tilde{\mathbf{A}}(\mathbf{w}) \overline{\mathbf{A}}_s^\top - \mathbf{T}^\top \mathbf{A} \overline{\mathbf{A}}_s^\top\} \end{aligned} \quad (51)$$

where  $\mathbf{D}_h = \text{diag}(\mathbf{h})$ . The coefficients of the second-order polynom involved in equation 50 used to solve the problem, satisfy the following equations,

$$a = \alpha \text{tr}\{(\tilde{\mathbf{C}}(\mathbf{x}^* - \mathbf{w}) \odot \tilde{\mathbf{C}}(\mathbf{x}^* - \mathbf{w})) \mathbf{h} \mathbf{h}^\top\} + (1 - \alpha) \text{tr}\{\mathbf{D}_h \tilde{\mathbf{A}}(\mathbf{x}^* - \mathbf{w}) \tilde{\mathbf{A}}(\mathbf{x} - \mathbf{w})^\top\} - \lambda \|\mathbf{x}^* - \mathbf{w}\|_2^2 \quad (52)$$

$$\begin{aligned} b &= 2\alpha \text{tr}\{(\tilde{\mathbf{C}}(\mathbf{x}^* - \mathbf{w}) \odot \tilde{\mathbf{C}}(\mathbf{w})) \mathbf{h} \mathbf{h}^\top - \tilde{\mathbf{C}}(\mathbf{x}^* - \mathbf{w}) \mathbf{T}^\top \mathbf{C} \mathbf{T}\} \\ &\quad + (1 - \alpha) \text{tr}\{\mathbf{D}_h \tilde{\mathbf{A}}(\mathbf{x}^* - \mathbf{w}) \tilde{\mathbf{A}}(\mathbf{w})^\top - \mathbf{T}^\top \mathbf{A} \tilde{\mathbf{A}}(\mathbf{x}^* - \mathbf{w})^\top\} - 2\lambda \langle \mathbf{w}, \mathbf{x} - \mathbf{w} \rangle \end{aligned} \quad (53)$$



### 3.2.2. DICTIONARY LEARNING AND ONLINE ALGORITHM

Assume now that the dictionary  $\{(\overline{\mathbf{C}}_s, \overline{\mathbf{A}}_s)\}_{s \in [S]}$  is not known and has to be estimated from the data. We define a dataset of  $K$  labeled graphs  $\{G^{(k)} : (\mathbf{C}^{(k)}, \mathbf{A}^{(k)}, \mathbf{h}^{(k)})\}_{k \in [K]}$ . Recall that each labeled graph  $G^{(k)}$  of order  $N^{(k)}$  is summarized by its pairwise relation matrix  $\mathbf{C}^{(k)} \in S_{N^{(k)}}(\mathbb{R})$ , its matrix of node features  $\mathbf{A}^{(k)} \in \mathbb{R}^{N^{(k)} \times d}$  and weights  $\mathbf{h}^{(k)} \in \Sigma_{N^{(k)}}$  over nodes. The DL problem, that aims at estimating the optimal dictionary for a given dataset can be expressed as:

$$\min_{\substack{\{\mathbf{w}^{(k)}\}_{k \in [K]} \\ \{(\overline{\mathbf{C}}_s, \overline{\mathbf{A}}_s)\}_{s \in [S]}}} \sum_{k=1}^K FGW_{2,\alpha}^2(\mathbf{C}^{(k)}, \mathbf{A}^{(k)}, \tilde{\mathbf{C}}(\mathbf{w}^{(k)}), \tilde{\mathbf{A}}(\mathbf{w}^{(k)})) - \lambda \|\mathbf{w}^{(k)}\|_2^2 \quad (54)$$

where  $\mathbf{w}^{(k)} \in \Sigma_S$ ,  $\overline{\mathbf{C}}_s \in S_N(\mathbb{R})$ ,  $\overline{\mathbf{A}}_s \in \mathbb{R}^{N \times d}$ . We refer the reader to the main paper for the discussion on the non-convex problem 45 which can be transposed to problem 54. To tackle this problem we proposed a stochastic algorithm 6

---

**Algorithm 6** GDL: stochastic update of atoms  $\{(\overline{\mathbf{C}}_s, \overline{\mathbf{A}}_s)\}_{s \in [S]}$

---

- 1: Sample a minibatch of graphs  $\mathcal{B} := \{(\mathbf{C}^{(k)}, \mathbf{A}^{(k)})\}_{k \in \mathcal{B}}$ .
- 2: Compute optimal  $\{(\mathbf{w}^{(k)}, \mathbf{T}^{(k)})\}_{k \in [\mathcal{B}]}$  by solving  $B$  independent unmixing problems with Alg.4.
- 3: Gradients step with estimated gradients  $\tilde{\nabla}_{\overline{\mathbf{C}}_s}$  (see equation 47), and  $\tilde{\nabla}_{\overline{\mathbf{A}}_s}$  (see equation 56),  $\forall s \in [S]$ .

$$\overline{\mathbf{C}}_s \leftarrow Proj_{S_N(\mathbb{R})}(\overline{\mathbf{C}}_s - \eta_C \tilde{\nabla}_{\overline{\mathbf{C}}_s}) \quad \text{and} \quad \overline{\mathbf{A}}_s \leftarrow \overline{\mathbf{A}}_s - \eta_A \tilde{\nabla}_{\overline{\mathbf{A}}_s} \quad (55)$$


---

Estimated gradients *w.r.t*  $\{\overline{\mathbf{C}}_s\}$  and  $\{\overline{\mathbf{A}}_s\}$  over a minibatch of graphs  $\mathcal{B} := \{(\mathbf{C}^{(k)}, \mathbf{A}^{(k)})\}_{k \in \mathcal{B}}$  given unmixing solutions  $\{(\mathbf{w}^{(k)}, \mathbf{T}^{(k)})\}_{k \in [\mathcal{B}]}$  can be computed separately. The ones related to the GW objective are described in equation 47, while the ones related to the Wasserstein objective satisfy equation 56:

$$\tilde{\nabla}_{\overline{\mathbf{A}}_s} \left( \sum_{k \in \mathcal{B}} \mathcal{F}(\mathbf{A}^{(k)}, \tilde{\mathbf{A}}(\mathbf{w}^{(k)}), \mathbf{T}^{(k)}) \right) = \frac{2}{B} \sum_{k \in \mathcal{B}} w_s^{(k)} \{D_{\mathbf{h}} \tilde{\mathbf{A}}(\mathbf{w}^{(k)}) - \mathbf{T}^\top \mathbf{A}^{(k)}\} \quad (56)$$

### 3.3. Learning the graph structure and nodes distribution

Here we extend our GDL model defined in equation 45 and propose to learn atoms of the form  $\{(\overline{\mathbf{C}}_s, \overline{\mathbf{h}}_s)\}_{s \in [S]}$ . In this setting we have two independent dictionaries modeling the relative importance of the nodes with  $\overline{\mathbf{h}}_s \in \Sigma_N$ , and their pairwise relations through  $\overline{\mathbf{C}}_s$ . This dictionary learning problem reads:

$$\min_{\substack{\{\mathbf{w}^{(k)}, \mathbf{v}^{(k)}\}_{k \in [K]} \\ \{(\overline{\mathbf{C}}_s, \overline{\mathbf{h}}_s)\}_{s \in [S]}}} \sum_{k=1}^K GW_2^2(\mathbf{C}^{(k)}, \tilde{\mathbf{C}}(\mathbf{w}^{(k)}), \mathbf{h}^{(k)}, \tilde{\mathbf{h}}(\mathbf{v}^{(k)})) - \lambda \|\mathbf{w}^{(k)}\|_2^2 - \mu \|\mathbf{v}^{(k)}\|_2^2 \quad (57)$$

where  $\mathbf{w}^{(k)}, \mathbf{v}^{(k)} \in \Sigma_S$  are the structure and distribution embeddings and the linear models are defined as:

$$\forall k, \tilde{\mathbf{h}}(\mathbf{v}^{(k)}) = \sum_s v_s^{(k)} \overline{\mathbf{h}}_s, \quad \tilde{\mathbf{C}}(\mathbf{w}^{(k)}) = \sum_s w_s^{(k)} \overline{\mathbf{C}}_s \quad (58)$$

Here we exploit fully the GW formalism by estimating simultaneously the graph distribution  $\tilde{\mathbf{h}}$  and its geometric structure  $\tilde{\mathbf{C}}$ . Optimization problem 57 can be solved by an adaptation of stochastic Algorithm 3. Indeed, in the light of the proposition 3, we can derive the following equation 59 between the input graph  $(\mathbf{C}^{(k)}, \mathbf{h}^{(k)})$  and its embedded representation  $\tilde{\mathbf{C}}(\mathbf{w}^{(k)})$  and  $\tilde{\mathbf{h}}(\mathbf{v}^{(k)})$ , given an optimal coupling  $\mathbf{T}^{(k)}$  satisfying Proposition 3,

$$2\langle \mathbf{L}(\mathbf{C}^{(k)}, \tilde{\mathbf{C}}(\mathbf{w}^{(k)})) \otimes \mathbf{T}^{(k)}, \mathbf{T}^{(k)} \rangle = \langle \mathbf{u}^{(k)}, \mathbf{h}^{(k)} \rangle + \langle \tilde{\mathbf{u}}^{(k)}, \tilde{\mathbf{h}}(\mathbf{v}^{(k)}) \rangle \quad (59)$$

where  $\mathbf{u}^{(k)}, \tilde{\mathbf{u}}^{(k)}$  are dual potentials of the induced linear OT problem.

First, with this observation we estimate the structure/node weights unmixings  $(\mathbf{w}^{(k)}, \mathbf{v}^{(k)})$  for the graph  $G^{(k)}$ . We proposed the BCD algorithm 7 derived from the initial BCD 1. Note that the dual variables of the induced linear OT problems are centered to ensure numerical stability.

---

**Algorithm 7** BCD for extended GW unmixing problem inherent to equation 57

---

- 1: Initialize embeddings such as  $\mathbf{w} = \mathbf{v} = \frac{1}{S} \mathbf{1}_S$
  - 2: **repeat**
  - 3:   Compute OT matrix  $\mathbf{T}$  of  $GW_2^2(\mathbf{C}, \tilde{\mathbf{C}}(\mathbf{w}), \mathbf{h}, \tilde{\mathbf{h}}(\mathbf{v}))$ , with CG algorithm (Vayer et al., 2018, Alg.1 & 2). From the finale iteration of CG, get dual potentials  $(\mathbf{u}, \tilde{\mathbf{u}})$  of the corresponding linear OT problem (see Proposition 3).
  - 4:   Compute the optimal  $\mathbf{v}$  by minimizing equation 59 w.r.t  $\mathbf{v}$  given  $\tilde{\mathbf{u}}$  with a CG algorithm.
  - 5:   Compute the optimal  $\mathbf{w}$  solving equation 39 given  $\mathbf{T}$  and  $\mathbf{v}$  with CG algorithm 2.
  - 6: **until** convergence
- 

Second, now that we benefit from an algorithm to project any graph  $G^{(k)} = (\mathbf{C}^{(k)}, \mathbf{h}^{(k)})$  onto the linear representations described in 58, we extend the stochastic algorithm 3. to the problem 57. This extension is described in algorithm 8.

---

**Algorithm 8** extended GDL: stochastic update of atoms  $\{(\overline{\mathbf{C}}_s, \overline{\mathbf{h}}_s)\}_{s \in [S]}$ 

---

- 1: Sample a minibatch of graphs  $\mathcal{B} := \{(\mathbf{C}^{(k)}, \mathbf{h}^{(k)})\}_{k \in \mathcal{B}}$ .
- 2: Compute optimal embeddings  $\{(\mathbf{w}^{(k)}, \mathbf{v}^{(k)})\}_{k \in [B]}$  coming jointly with the set of OT variables  $(\mathbf{T}^{(k)}, \mathbf{u}^{(k)}, \tilde{\mathbf{u}}^{(k)})$  by solving B independent unmixing problems with Alg.7.
- 3: Projected gradient step with estimated gradients  $\tilde{\nabla}_{\overline{\mathbf{C}}_s}$  (see equation 47) and  $\tilde{\nabla}_{\overline{\mathbf{h}}_s}$  (see equation 61),  $\forall s \in [S]$ :

$$\overline{\mathbf{C}}_s \leftarrow Proj_{S_N(\mathbb{R})}(\overline{\mathbf{C}}_s - \eta_C \tilde{\nabla}_{\overline{\mathbf{C}}_s}) \quad \text{and} \quad \overline{\mathbf{h}}_s \leftarrow Proj_{\Sigma_N}(\overline{\mathbf{h}}_s - \eta_h \tilde{\nabla}_{\overline{\mathbf{h}}_s}) \quad (60)$$

---

For a minibatch a graphs  $\{\mathbf{C}_k, \mathbf{h}_k\}_{k \in [B]}$ , once each unmixing problems are solved independently estimating unmixings  $\{(\mathbf{w}^{(k)}, \mathbf{v}^{(k)})\}_k$  and the underlying OT matrix  $\mathbf{T}^{(k)}$  associated with potential  $\tilde{\mathbf{u}}^{(k)}$ , we perform simultaneously a projected gradient step update of  $\{\overline{\mathbf{C}}_s\}_s$  and  $\{\overline{\mathbf{h}}_s\}_s$ . The estimated gradients of equation 57 w.r.t  $\{\overline{\mathbf{h}}_s\}_s$  reads  $\forall s \in [S]$ ,

$$\tilde{\nabla}_{\overline{\mathbf{h}}_s} = \frac{1}{2B} \sum_{k \in [B]} v_s^{(k)} \tilde{\mathbf{u}}^{(k)} \quad (61)$$

## 4. Numerical experiments

### 4.1. Datasets

Table 1. Datasets descriptions

| datasets | features          | #graphs | #classes | mean #nodes | min #nodes | max #nodes | median #nodes | mean connectivity rate |
|----------|-------------------|---------|----------|-------------|------------|------------|---------------|------------------------|
| IMDB-B   | None              | 1000    | 2        | 19.77       | 12         | 136        | 17            | 55.53                  |
| IMDB-M   | None              | 1500    | 3        | 13.00       | 7          | 89         | 10            | 86.44                  |
| MUTAG    | {0..2}            | 188     | 2        | 17.93       | 10         | 28         | 17.5          | 14.79                  |
| PTC-MR   | {0, ..., 17}      | 344     | 2        | 14.29       | 2          | 64         | 13            | 25.1                   |
| BZR      | $\mathbb{R}^3$    | 405     | 2        | 35.75       | 13         | 57         | 35            | 6.70                   |
| COX2     | $\mathbb{R}^3$    | 467     | 2        | 41.23       | 32         | 56         | 41            | 5.24                   |
| PROTEIN  | $\mathbb{R}^{29}$ | 1113    | 2        | 29.06       | 4          | 620        | 26            | 23.58                  |
| ENZYMES  | $\mathbb{R}^{18}$ | 600     | 6        | 32.63       | 2          | 126        | 32            | 17.14                  |

We considered well-known benchmark datasets divided into three categories: i) IMDB-B and IMDB-M (Yanardag & Vishwanathan, 2015) gather graphs without node attributes derived from social networks; ii) graphs with discrete attributes representing chemical compounds from MUTAG (Debnath et al., 1991) and cuneiform signs from PTC-MR (Krichene et al., 2015); iii) graphs with real vectors as attributes, namely BZR, COX2 (Sutherland et al., 2003) and PROTEINS, ENZYMES (Borgwardt & Kriegel, 2005). Details on each dataset are reported in Table 1

### 4.2. Settings

In the following, we detail the benchmark of our methods on supervised classification along additional (shared) considerations we made regarding the learning of our models. To consistently benchmark methods and configurations, as real graph datasets commonly used in machine learning literature show a high variance considering structure, we perform a nested cross validation (using 9 folds for training, 1 for testing, and reporting the average accuracy of this experiment repeated 10

---

550 times) by keeping same folds across methods. All splits are balanced *w.r.t* labels. In following results, parameters of SVM  
551 are cross validated within  $C \in \{10^{-7}, 10^{-6}, \dots, 10^7\}$  and  $\gamma \in \{2^{-10}, 2^{-9}, \dots, 2^{10}\}$ .

552 For our approach, similar dictionaries are considered for unsupervised classification presented in the main paper, than  
553 for the supervised classification benchmark detailed in the following. So we refer the reader to the main paper for most  
554 implementation details. For completeness, we picked a batch size of 16. We initialized learning rate on the structure  $\{\bar{C}_s\}$  at  
555 0.1. In the presence of node features, we set a learning rate on  $\{\bar{A}_s\}$  of 0.1 if  $\alpha < 0.5$  and 1.0 otherwise. We optimized our  
556 dictionaries without features over 20 epochs and those with features over 40 epochs. In the following, we denote GDL-w  
557 the SVMs derived from embeddings  $w$  endowed with the Mahalanobis distance. While GDL-g denotes the SVMs derived  
558 from embedded graphs with the (F)GW distance. (Xu, 2020) proposed a supervised extension to their Gromov-Wasserstein  
559 Factorization (GWF), we refer to GWF-r and GWF-f when the dictionary atoms have random size or when we fix it to match  
560 our method. His supervised approach consists in balancing the dictionary objective with a classification loss by plugging  
561 a MLP classifier to the unconstrained embedding space. We explicitly regularized the learning procedure by monitoring  
562 the accuracy on train splits. Note that in their approach they relaxed constraints of their unmixing problems by applying  
563 a softmax on unconstrained embeddings to conduct barycenters estimation. Moreover, they constrain the graph atoms to  
564 be non-negative as it enhances numerical stability of their learning procedure. For fair comparisons, we considered this  
565 restriction for all dictionaries even if we did not observe any noticeable impact of this hypothesis on our approach. As for  
566 unsupervised experiments, we followed their architecture choices. We further validated their regularization coefficient in  
567  $\{1., 0.1, 0.01, 0.001\}$ . Their model converge over 10 epochs for datasets without features, and 20 epochs otherwise.

569 We also considered several kernel based approaches. (FGWK) The kernels  $e^{-\gamma FGW}$  proposed by (Vayer et al., 2018) where  
570 pairwise distances are computed using CG algorithms using POT library (Flamary & Courty, 2017). To get a grasp of the  
571 approximation error from this algorithmic approach, we also applied the MCMC algorithm proposed by (Chowdhury &  
572 Needham, 2020) to compute FGW distance matrices with a better precision (S-GWK). As the proper graph representations  
573 for OT-based methods is still a question of key interest, we consistently benchmarked our approach and these kernels when  
574 we consider adjacency and shortest-path representations. Moreover, we experimented on the heat kernels over normalized  
575 laplacian matrices suggested by (Chowdhury & Needham, 2020) on datasets without attributes, where we validated the  
576 diffusion parameter  $t \in \{5, 10, 20\}$ . We also reproduced the benchmark for classification on Graph Kernels done by (Vayer  
577 et al., 2018) by keeping their tested parameters for each method. (SPK) denotes the shortest path kernel (Borgwardt &  
578 Kriegel, 2005), (RWK) the random walk kernel (Gärtner et al., 2003), (WLK) the Weisfeiler Lehman kernel (Vishwanathan  
579 et al., 2010), (GK) the graphlet count kernel (Shervashidze et al., 2009). For real valued vector attributes, we consider the  
580 HOPPER kernel (HOPPERK) (Feragen et al., 2013) and the propagation kernel (PROPAK) (Neumann et al., 2016). We  
581 built upon the GraKel library (Siglidis et al., 2020) to construct the kernels.

582 Finally to compare our performances to recent state-of-the-art models for supervised graph classification, we partly replicated  
583 the benchmark done by (Xu et al., 2018). We experimented on their best model GIN-0 and the model of (Niepert et al.,  
584 2016) PSCN. r. For both we used the Adam optimizer (Kingma & Ba, 2014) with initial learning rate 0.01 and decayed the  
585 learning rate by 0.5 every 50 epochs. The number of hidden units is chosen depending on dataset statistics as they propose,  
586 batch normalization (Ioffe & Szegedy, 2015) was applied on each of them. The batch size was fixed at 128. We fixed a  
587 dropout ratio of 0.5 after the dense layer (Srivastava et al., 2014). The number of epochs was 150 and the model with the  
588 best cross-validation accuracy averaged over the 10 folds was selected at each epoch.

### 590 4.3. Results on supervised classification

592 The accuracies of the nested-cross validation on described datasets are reported in Tables 2, 3, 4. First, we observe as  
593 anticipated that the model GIN-0 (Xu et al., 2018) outperforms most of the time other methods including PSCN, which has  
594 been consistently argued in their paper. Moreover, (F)GW kernels over the embedded graphs built thanks to our dictionary  
595 approach consistently outperforms (F)GW kernels from input graphs. Hence, it supports that our dictionaries are able to  
596 properly denoise and capture discriminant patterns of these graphs, outperforming other models expect GNN on 6 datasets  
597 out of 8. The Mahalanobis distance over embeddings  $w$  demonstrates satisfying results compared to FGWK relatively to  
598 the model simplification it brings. We also observe consistent improvements of the classification performances when we  
599 use the MCMC algorithm (Chowdhury & Needham, 2020) to estimate (F)GW pairwise distance matrices, for all tested  
600 graph representations reported. This estimation procedure for (F)GW distances is computationally heavy compared to the  
601 usual CG gradient algorithm (Vayer et al., 2018). Hence, we believe that it could bring significant improvements to our  
602 dictionary learning models but would increase too consequently the run time of solving unmixing problems required for  
603 each dictionary updates. Finally, results over adjacency and shortest path representations interestingly suggest that their  
604

suitability *w.r.t* (F)GW distance is correlated to the averaged connectivity rate (see 1) in different ways depending on the kind of node features. We envision to study these correlations in future works.

**Table 2. Graphs without attributes:** Classification results of 10-fold nested-cross validation on real datasets. Best results are highlighted in bold independently of the depicted model category, and the best performances from not end-to-end supervised methods are reported in italic.

| category  | model           | IMDB-B             | IMDB-M             |
|-----------|-----------------|--------------------|--------------------|
| OT (Ours) | GDL-w (ADJ)     | 70.11(3.13)        | 49.01(3.66)        |
|           | GDL-g (ADJ)     | <i>72.06(4.09)</i> | <i>50.64(4.41)</i> |
|           | GDL-w (SP)      | 65.4(3.65)         | 48.03(3.80)        |
|           | GDL-g (SP)      | 68.24(4.38)        | 48.47(4.21)        |
| OT        | FGWK (ADJ)      | 70.8(3.54)         | 48.89(3.93)        |
|           | FGWK (SP)       | 65.0(3.69)         | 47.8(3.84)         |
|           | FGWK (heatLAP)  | 67.7(2.76)         | 48.11(3.96)        |
|           | S-GWK (ADJ)     | 71.95(3.87)        | 49.97(3.95)        |
|           | S-GWK (heatLAP) | 71.05(3.02)        | 49.24(3.49)        |
|           | GWF-r (ADJ)     | 65.08(2.85)        | 47.53(3.16)        |
|           | GWF-f (ADJ)     | 64.68(2.27)        | 47.19(2.96)        |
| Kernels   | GK (K=3)        | 57.11(3.49)        | 41.85(4.52)        |
|           | SPK             | 56.18(2.87)        | 39.07(4.89)        |
| GNN       | PSCN            | 71.23(2.13)        | 45.7(2.71)         |
|           | GIN-0           | <b>74.7(4.98)</b>  | <b>52.19(2.71)</b> |

**Table 3. Graphs with discrete attributes :** Classification results of 10-fold nested-cross validation on real datasets with discrete attributes (one-hot encoded). Best results are highlighted in bold independently of the depicted model category, and the best performances from not end-to-end methods are reported in italic.

| category  | model       | MUTAG              | PTC-MR             |
|-----------|-------------|--------------------|--------------------|
| OT (Ours) | GDL-w (ADJ) | 81.07(7.81)        | 55.26(8.01)        |
|           | GDL-g (ADJ) | 85.84(6.86)        | 58.45(7.73)        |
|           | GDL-w (SP)  | 84.58(6.70)        | 55.13(6.03)        |
|           | GDL-g (SP)  | <i>87.09(6.34)</i> | <i>57.09(6.59)</i> |
| OT        | FGWK (ADJ)  | 82.63(7.16)        | 56.17(8.85)        |
|           | FGWK (SP)   | 84.42(7.29)        | 55.4(6.97)         |
|           | S-GWK (ADJ) | 84.08(6.93)        | 57.89(7.54)        |
|           | GWF-r (ADJ) | -                  | -                  |
|           | GWF-f (ADJ) | -                  | -                  |
| Kernels   | GK (K=3)    | 82.86(7.93)        | 57.11(7.24)        |
|           | SPK         | 83.29(8.01)        | 60.55(6.43)        |
|           | RWK         | 79.53(7.85)        | 55.71(6.86)        |
|           | WLK         | 86.44(7.95)        | <i>63.14(6.59)</i> |
| GNN       | PSCN        | <b>91.4(4.41)</b>  | 58.9(5.12)         |
|           | GIN-0       | 88.95(4.91)        | <b>64.12(6.83)</b> |

**Table 4. Graphs with vectorial attributes:** Classification results of 10-fold nested-cross validation on real datasets with vectorial features. Best results are highlighted in bold independently of the depicted model category, and the best performances from not end-to-end supervised methods are reported in italic.

| category  | model       | BZR                | COX2               | ENZYMES            | PROTEIN            |
|-----------|-------------|--------------------|--------------------|--------------------|--------------------|
| OT (ours) | GDL-w (ADJ) | 87.32(3.58)        | 76.59(3.18)        | 70.68(3.36)        | 72.13(3.14)        |
|           | GDL-g (ADJ) | <i>87.81(4.31)</i> | 78.11(5.13)        | 71.44(4.19)        | 74.59(4.95)        |
|           | GDL-w (SP)  | 83.96(5.51)        | 75.9(3.81)         | 69.95(5.01)        | 72.95(3.68)        |
|           | GDL-g (SP)  | 84.61(5.89)        | 76.86(4.91)        | 71.47(5.98)        | <i>74.86(4.38)</i> |
| OT        | FGWK (ADJ)  | 85.61(5.17)        | 77.02(4.16)        | 72.17(3.95)        | 72.41(4.70)        |
|           | FGWK (SP)   | 84.15(6.39)        | 76.53(4.68)        | 70.53(6.21)        | 74.34(3.27)        |
|           | S-GWK (ADJ) | 86.91(5.49)        | 77.85(4.35)        | <b>73.03(3.84)</b> | 73.51(4.96)        |
|           | GWF-r (ADJ) | 83.61(4.96)        | 75.33(4.18)        | 72.53(5.39)        | 73.64(2.48)        |
|           | GWF-f (ADJ) | 83.72(5.11)        | 74.96(4.0)         | 72.14(4.97)        | 73.06(2.06)        |
| Kernels   | HOPPERK     | 84.51(5.22)        | <i>79.68(3.48)</i> | 46.2(3.75)         | 72.07(3.06)        |
|           | PROPAK      | 80.01(5.11)        | 77.81(3.84)        | 71.84(5.80)        | 61.73(4.5)         |
| GNN       | PSCN        | 83.91(5.71)        | 75.21(3.29)        | 43.89(3.91)        | 74.96(2.71)        |
|           | GIN-0       | <b>88.71(5.48)</b> | <b>81.13(4.51)</b> | 68.6(3.69)         | <b>76.31(2.94)</b> |

#### 4.4. Complementary results on unsupervised classification

**vanilla GDL** As mentioned in section 4 of the main paper, we considered a fixed batch size for learning our models on labeled graphs, which turned out to be a limitation for the dataset ENZYMES. We report in table 5 our models performance on this dataset for a batch size fixed to 64 instead of 32 within the framework detailed above. These results are consistent with those observed on the other datasets.

Table 5. Clustering : dataset ENZYMES

| MODELS           | ENZYMES            |
|------------------|--------------------|
| GDL              | 71.83(0.18)        |
| GDL $_{\lambda}$ | <b>72.92(0.28)</b> |

**extended version of GDL** We report here a companion study for clustering tasks which further supports our extension of GDL to the learning of node weights. As there is no Mahalanobis upper-bound for the linear models learned with this extension as their node weights are a priori different, we compare performances of K-means with GW distance applied on the embedded graphs produced with vanilla GDL, the extended version of GDL denoted here GDL $_h$  and GWF. Similar considerations have been made for learning GDL $_h$  than those detailed for GDL, and we completed these results with an ablation of the quadratic negative regularization parameterized by  $\lambda$ . Results provided in 6 show that GW Kmeans applied to the graph representations from our method GDL $_h$  leads to state-of-the-art performances.

Table 6. Clustering: RI from GW Kmeans on embedded graphs.

| models          | $\lambda$ | IMDB-B             | IMDB-M            |
|-----------------|-----------|--------------------|-------------------|
| GDL (ours)      | 0         | 51.54(0.29)        | 55.86(0.25)       |
|                 | > 0       | 51.97(0.48)        | 56.41(0.35)       |
| GDL $_h$ (ours) | 0         | 52.51(0.22)        | <b>57.12(0.3)</b> |
|                 | > 0       | <b>53.09(0.38)</b> | 56.95(0.25)       |
| GWF-r           | NA        | 51.39(0.15)        | 55.80(0.21)       |
| GWF-f           | NA        | 50.93(0.39)        | 54.48(0.26)       |

#### 4.5. Runtimes

We report in Table 7 averaged runtimes for the same relative precision of  $10^{-4}$  to compute one graph embedding on learned dictionaries from real datasets.

Table 7. Averaged runtimes.

| dataset | # atoms | GDL   | GWF    |
|---------|---------|-------|--------|
| IMDB-B  | 12      | 52 ms | 123 ms |
|         | 16      | 69 ms | 186 ms |
| IMDB-M  | 12      | 44 ms | 101 ms |
|         | 18      | 71 ms | 168 ms |

## References

- Borgwardt, K. M. and Kriegel, H.-P. Shortest-path kernels on graphs. In *Fifth IEEE international conference on data mining (ICDM'05)*, pp. 8–pp. IEEE, 2005.
- Chowdhury, S. and Needham, T. Generalized Spectral Clustering via Gromov-Wasserstein Learning. *arXiv:2006.04163 [cs, math, stat]*, June 2020. arXiv: 2006.04163.
- Debnath, A. K., Lopez de Compadre, R. L., Debnath, G., Shusterman, A. J., and Hansch, C. Structure-activity relationship of mutagenic aromatic and heteroaromatic nitro compounds. correlation with molecular orbital energies and hydrophobicity. *Journal of medicinal chemistry*, 34(2):786–797, 1991.
- Feragen, A., Kasenburg, N., Petersen, J., de Bruijne, M., and Borgwardt, K. M. Scalable kernels for graphs with continuous attributes. In *NIPS*, pp. 216–224, 2013.
- Flamary, R. and Courty, N. Pot python optimal transport library. *GitHub: <https://github.com/rflamary/POT>*, 2017.

---

715 Gärtner, T., Flach, P., and Wrobel, S. On graph kernels: Hardness results and efficient alternatives. In *Learning theory and*  
716 *kernel machines*, pp. 129–143. Springer, 2003.

717 Ioffe, S. and Szegedy, C. Batch normalization: Accelerating deep network training by reducing internal covariate shift. In  
718 *International conference on machine learning*, pp. 448–456. PMLR, 2015.

719

720 Kingma, D. P. and Ba, J. Adam: A method for stochastic optimization. *arXiv preprint arXiv:1412.6980*, 2014.

721

722 Krichene, W., Krichene, S., and Bayen, A. Efficient bregman projections onto the simplex. In *2015 54th IEEE Conference*  
723 *on Decision and Control (CDC)*, pp. 3291–3298. IEEE, 2015.

724

725 Li, P., Rangapuram, S. S., and Slawski, M. Methods for sparse and low-rank recovery under simplex constraints. *arXiv*  
726 *preprint arXiv:1605.00507*, 2016.

727

728 Murty, K. *Linear Complementarity, Linear and Nonlinear Programming*. Sigma series in applied mathematics. Heldermann,  
1988. ISBN 978-3-88538-403-8.

729

730 Neumann, M., Garnett, R., Bauckhage, C., and Kersting, K. Propagation kernels: efficient graph kernels from propagated  
731 information. *Machine Learning*, 102(2):209–245, 2016.

732

733 Niepert, M., Ahmed, M., and Kutzkov, K. Learning convolutional neural networks for graphs. In *International conference*  
734 *on machine learning*, pp. 2014–2023, 2016.

735

736 Peyré, G., Cuturi, M., and Solomon, J. Gromov-wasserstein averaging of kernel and distance matrices. In *International*  
737 *Conference on Machine Learning*, pp. 2664–2672, 2016.

738

739 Shervashidze, N., Vishwanathan, S., Petri, T., Mehlhorn, K., and Borgwardt, K. Efficient graphlet kernels for large graph  
comparison. In *Artificial intelligence and statistics*, pp. 488–495. PMLR, 2009.

740

741 Siglidis, G., Nikolentzos, G., Limnios, S., Giatsidis, C., Skianis, K., and Vazirgiannis, M. Grakel: A graph kernel library in  
742 python. *Journal of Machine Learning Research*, 21(54):1–5, 2020.

743

744 Srivastava, N., Hinton, G., Krizhevsky, A., Sutskever, I., and Salakhutdinov, R. Dropout: a simple way to prevent neural  
745 networks from overfitting. *The journal of machine learning research*, 15(1):1929–1958, 2014.

746

747 Sutherland, J. J., O’Brien, L. A., and Weaver, D. F. Spline-fitting with a genetic algorithm: A method for developing  
748 classification structure- activity relationships. *Journal of chemical information and computer sciences*, 43(6):1906–1915,  
2003.

749

750 Tseng, P. Convergence of a block coordinate descent method for nondifferentiable minimization. *Journal of optimization*  
751 *theory and applications*, 109(3):475–494, 2001.

752

753 Vayer, T., Chapel, L., Flamary, R., Tavenard, R., and Courty, N. Fused gromov-wasserstein distance for structured objects:  
754 theoretical foundations and mathematical properties. *arXiv preprint arXiv:1811.02834*, 2018.

755

756 Vayer, T., Courty, N., Tavenard, R., and Flamary, R. Optimal transport for structured data with application on graphs. In  
*International Conference on Machine Learning*, pp. 6275–6284. PMLR, 2019.

757

758 Vishwanathan, S. V. N., Schraudolph, N. N., Kondor, R., and Borgwardt, K. M. Graph kernels. *The Journal of Machine*  
759 *Learning Research*, 11:1201–1242, 2010.

760

761 Xu, H. Gromov-wasserstein factorization models for graph clustering. In *Proceedings of the AAAI Conference on Artificial*  
762 *Intelligence*, volume 34, pp. 6478–6485, 2020.

763

764 Xu, K., Hu, W., Leskovec, J., and Jegelka, S. How powerful are graph neural networks? *arXiv preprint arXiv:1810.00826*,  
2018.

765

766 Yanardag, P. and Vishwanathan, S. Deep graph kernels. In *Proceedings of the 21th ACM SIGKDD international conference*  
767 *on knowledge discovery and data mining*, pp. 1365–1374, 2015.

768

769
